# 1 **Low Repeatability of Aversive Learning in Zebrafish (*Danio*** 2 ***rerio*)**

3

4 Dominic Mason<sup>1</sup>, Susanne Zajitschek<sup>1,2</sup> Hamza Anwer<sup>1</sup>, Rose E O’Dea<sup>1</sup>, Daniel Hesselson<sup>3,4</sup>,  
5 Shinichi Nakagawa<sup>1</sup>

6 <sup>1</sup>Evolution and Ecology Research Centre, School of Biological and Environmental Sciences,  
7 University of New South Wales, Sydney 2052 NSW, Australia.

8 <sup>2</sup>School of Biological and Environmental Sciences, Liverpool John Moores University,  
9 Liverpool L3 3AF, United Kingdom.

10 <sup>3</sup>Diabetes and Metabolism Division, Garvan Institute of Medical Research, Sydney, NSW,  
11 Australia.

12 <sup>4</sup>St Vincent's Clinical School, UNSW, Australia, Sydney, NSW, Australia.

13

14 Author for correspondence: D. Mason

15 e-mail: [dpmason91@gmail.com](mailto:dpmason91@gmail.com)

16

17 **Keywords.** Repeatability, Learning, Zebrafish

18 **Ethics.** All procedures approved by the Garvan Animal Ethics Committee (ARA 18\_18) as  
19 noted in Methods.

20 **Data accessibility.** All data and code can be accessed at the Open Science Framework  
21 : (<https://osf.io/t95v3/>).

22 **Author Contributions. Dominic Mason:** Methodology, Data Curation, Formal Analysis,  
23 Investigation, Writing – original draft preparation, Writing – review and editing,  
24 Visualisation. **Susanna Zajitschek:** conceptualisation, methodology, Data Curation, Writing  
25 – review and editing, Supervision. **Hamza Anwer:** Writing – review and editing. **Rose**  
26 **O’Dea:** Data Curation, Writing – review and editing, Visualisation. **Daniel Hesselson:**  
27 Resources, Writing – review and editing. **Shinichi Nakagawa:** Conceptualization,  
28 Methodology, Software, Formal Analysis, Resources, Data Curation, Writing – review and  
29 editing, Supervision, Funding acquisition

30 **Competing interests.** No competing interests.

31 **Funding.** This research was funded through an Australian Research Council Discovery grant  
32 (DP180100818) awarded to S. Nakagawa

### 33 **Summary Statement**

34 Zebrafish exhibit low repeatability (intra-class correlation) in an aversive learning assay  
35 possibly due to past selection pressure exhausting genetic variance in this learning trait.

### 36 **Abstract**

37 Aversive learning – avoiding certain situations based on negative experiences – can  
38 profoundly increase fitness in animal species. The extent to which this cognitive mechanism  
39 could evolve depends upon individual differences in aversive learning being stable through  
40 time, and heritable across generations, yet no published study has quantified the stability of  
41 individual differences in aversive learning using the repeatability statistic,  $R$  (also known as  
42 the intra-class correlation). We assessed the repeatability of aversive learning by conditioning  
43 approximately 100 zebrafish (*Danio rerio*) to avoid a colour cue associated with a mild  
44 electric shock. Across eight different colour conditions zebrafish did not show consistent  
45 individual differences in aversive learning ( $R = 0.04$ ). Within conditions, when zebrafish  
46 were twice conditioned to the same colour, blue conditioning was more repeatable than green  
47 conditioning ( $R = 0.15$  and  $R = 0.02$ ). In contrast to the low repeatability estimates for  
48 aversive learning, zebrafish showed moderately consistent individual differences in colour  
49 preference during the baseline period (i.e. prior to aversive conditioning;  $R \sim 0.45$ ). Overall,  
50 aversive learning responses of zebrafish were weak and variable (difference in time spent  
51 near the aversive cue <6 seconds per minute), but individual differences in learning ability  
52 did not explain substantial variability. We speculate that either the effect of aversive learning  
53 was too weak to quantify consistent individual differences, or directional selection might  
54 have eroded additive genetic variance. Finally, we discuss how confounded repeatability  
55 assays and publication bias could have inflated average estimates of repeatability in animal  
56 behaviour publications.

57

## 58 **Introduction**

59 Animals use the cognitive process of learning, which can be defined as a change in behaviour  
60 due to past experience, to respond to the environment (Kawecki, 2010). Learning has a  
61 profound influence on survival and reproductive success (Krebs & Davies, 1987; Skinner,  
62 1984), and has been studied in a wide range of taxa. For example, individual learning speed  
63 has been correlated with foraging performance in bees (Raine & Chittka, 2008) and  
64 grasshoppers (Pasquier & Grüter, 2016); and greater cognitive capacity has been linked to  
65 higher reproductive success in magpies (Ashton et al., 2018) and male robins (Shaw et al.,  
66 2019), as well as to healthier body condition in wild primates (Huebner, Fichtel, & Kappeler,  
67 2018).

68  
69 Animals learn through association, which is reinforced differently by positive and negative  
70 experiences (appetitive and aversive learning, respectively). Appetitive learning takes place  
71 when individuals associate a stimulus with a ‘positive’ event, usually a food reward stimulus,  
72 whereas in aversive learning the association is with a ‘negative’ event, usually a fear inducing  
73 stimulus. Failing to learn from positive experiences (appetitive learning) prevents a potential  
74 benefit (i.e. a minor opportunity cost). Failing to learn from negative experiences may yield  
75 an immediate fatal cost. Therefore, both types of learning can increase lifetime fitness and  
76 drive natural selection, but appetitive learning may be under weaker selection than aversive  
77 learning.

78  
79 For traits to evolve they need heritable variation that can be subject to selection. For labile  
80 traits (i.e. traits expressed more than once over a lifetime) the consistency of individual  
81 differences in trait expression indicates potential heritability. The common approach to  
82 quantify consistent individual differences in eco-evolutionary studies is estimating the  
83 statistical index ‘repeatability’ ( $R$ ; otherwise known as the ‘intra-class correlation coefficient’  
84 or ICC; Lessells & Boag, 1987; Nakagawa & Schielzeth, 2010). Repeatability partitions  
85 variance into within-individual (residual) and between-individual components. Biologically,  
86 the repeatability of a trait is a measure showing the amount of observed variance which is due  
87 to individuals sustaining trait differences between each other (Nakagawa & Schielzeth,  
88 2010), but estimates can be inflated by measurement errors and experimental confounds  
89 (Dohm, 2002; Niemelä & Dingemanse, 2017).

90

91 Generally, behavioural traits are moderately repeatable ( $R = 0.34$ ; Bell et al., 2009; cf.  
92 Holtmann et al., 2017), with cognitive behavioural traits showing somewhat lower  
93 repeatability ( $R = 0.15 - 0.28$ ; Cauchoix et al. 2018). Our understanding of how natural  
94 selection shapes the evolution of cognitive traits remains poor (Boogert et al., 2018). Despite  
95 the extensive literature on aversive learning, no published study has comprehensively  
96 quantified its repeatability (but note Cauchoix et al. (2018) includes three unpublished studies  
97 with some measures of aversive learning). To reduce this knowledge gap, we quantify the  
98 repeatability of aversive learning behaviour in zebrafish (*Danio rerio*), a popular model  
99 organism in cognitive science (Gerlai, 2016; Norton & Bally-Cuif, 2010). Zebrafish exhibit a  
100 range of distinct behaviours that can be measured in previously established assays  
101 (Fangmeier et al., 2018; Meshalkina et al., 2017).

102

103 Here, we use an avoidance conditioning assay — associating a visual cue with a mild electric  
104 shock — to thoroughly assess the repeatability of aversive learning in zebrafish. We expect  
105 individuals to consistently differ in their aversive learning speeds (i.e. separation of better and  
106 worse learners). First, we examine repeatability across different colour pairs (four different  
107 pairs with eight possible combinations: 8 measurements per individual). We expect  
108 individuals to show consistent differences in aversive learning ability and, given the estimates  
109 for appetitive learning summarised in Cauchoix et al. (2018), predict a low to moderate  
110 repeatability. Second, to examine whether a constant learning environment increases the  
111 consistency of individual differences, we examine repeatability within one colour pair (both  
112 combinations of green and blue; 3 repeated measurements per individual for each colour).

113

## 114 **Methods**

### 115 **Zebrafish population**

116 Adult wildtype zebrafish were bred and maintained at the Garvan Institute of Medical  
117 Research in Sydney, Australia. Fish were housed in 3.5L Tecniplast ZebTEC tanks  
118 (maximum of 24 fish per 3.5L tank) under standard laboratory conditions ( $\sim 28^{\circ}\text{C}$ ;  $\sim \text{pH } 7.5$ ;  
119  $\sim 1000 \mu\text{s}$  conductivity; 12/12h from 7:30 light/dark rotation) and fed live *Artemia salina*  
120 nauplii twice a day and commercially available fish food once per day (O.range GROW-L).

121

122 We marked juvenile fish for individual identification at around 90 days post-fertilisation with  
123 coloured tags (red, brown, purple, black, white, yellow, orange, pink, or green). For marking,  
124 fish were anaesthetised in a tricaine solution (4.2ml of 0.4% in 100ml of system water) for 20  
125 seconds before being injected with Visible Implant Elastomer tags (VIE, Northwest Marine  
126 Technologies, Inc.; Shaw Island, Washington, United States). We injected fish twice (unless  
127 one mark was blank), one on either side of the dorsal fin (Hohn & Petrie-Hanson, 2013).  
128 Among these marked fish, we used a total of 103 zebrafish with approximately equal sex  
129 ratios kept in 4 tanks of 24 individuals (12 males, 12 females) for both experiments. At any  
130 one time during the experiments, the same 96 fish were used, but to compensate for death,  
131 illness or experimenter error, seven fish were replaced by seven new fish over the three  
132 month study. Due to incomplete data for zebrafish size (described below) the across  
133 conditions and within conditions analyses included 93 and 94 zebrafish, respectively. The  
134 Garvan Animal Ethics Committee approved all procedures described above and experiments  
135 described below (ARA 18\_18). Further, Garvan veterinarians oversaw fish welfare associated  
136 with aversive learning prior to our pilot tests.

137

## 138 **Experimental Design**

### 139 *Aversive Learning Assay*

140 We used an avoidance conditioning method to quantify aversive learning in a simple,  
141 automated assay (Brock et al., 2017; Fontana et al., 2019). We ran all assays using four  
142 Zantiks AD units (Zantiks Ltd., Cambridge, UK; see Supplementary Figures 1 and 2). The  
143 units employed infrared tracking using an integrated computer to record fish movement and  
144 collect data. In the assay, a visual cue (colour or pattern) was associated with a negative  
145 stimulus (brief mild electric shock; 7V DC 80ms), which motivated fish to avoid the  
146 associated visual cue. We then measured the extent of avoidance (i.e. time spent away from  
147 the cue associated with an electric shock) compared to the baseline preference to quantify  
148 aversive learning (association response). We based our initial assay parameters (e.g., the  
149 acclimation period, voltage, etc) on previous research (Brock et al., 2017), and subsequently  
150 modified the parameters based on the outcomes of pilot tests (see Supplementary  
151 Information).

152

153 Before each assay we individually placed fish into one of four lanes within rectangular tanks  
154 (see Figure 1A). For the assay, we exposed the fish to four stages; (i) Acclimation: we

155 habituated the fish to isolation in a novel environment over a 30-minute acclimation period  
156 (Figure 1B); (ii) Baseline: the tank was visually split into two even zones via the colour  
157 displaying screen at the bottom of the tank (Figure 1C). One of these two colours would later  
158 become conditioned with the mild electric shock (CS+), the other colour remained  
159 unconditioned (CS-). Here, the position of the colours (left or right) automatically switched  
160 every five minutes for a period of 30-minutes and we recorded zebrafish preference for the  
161 CS+ to obtain a baseline preference before conditioning; (iii) Conditioning: first, the CS+  
162 (visual cue associated with shock) was displayed across the entire screen for 1.5 seconds then  
163 immediately afterwards paired with the US (mild electric shock) to condition the fish to an  
164 aversive experience. Second, the CS- (visual cue not associated with shock) covered the  
165 screen for 8.5 seconds (Figure 1D). This phase was repeated nine times, sufficient for fish  
166 learning to avoid the CS+; and, (iv) Probe: akin to the baseline period, the tank was split into  
167 two even zones (left or right) depicted by different visual cues. We tracked fish movement  
168 and recorded fish preference for the visual cue associated with the shock (CS+) over 5  
169 minutes. During this time, the visual cues switched every minute (see Figure 1E). Probe CS+  
170 preference was used in comparison to baseline CS+ preferences to quantify learning. We  
171 used only 2 minutes out of the 5-minute probe time since we determined in our observations  
172 (see Supplementary Figure 5 & 6) a clear decrease in learning response. This probe length is  
173 similar to other studies Brock et al. (2017) use a 2-minute probe and Fontana et al., (2019)  
174 use a 1 minute probe.  
175

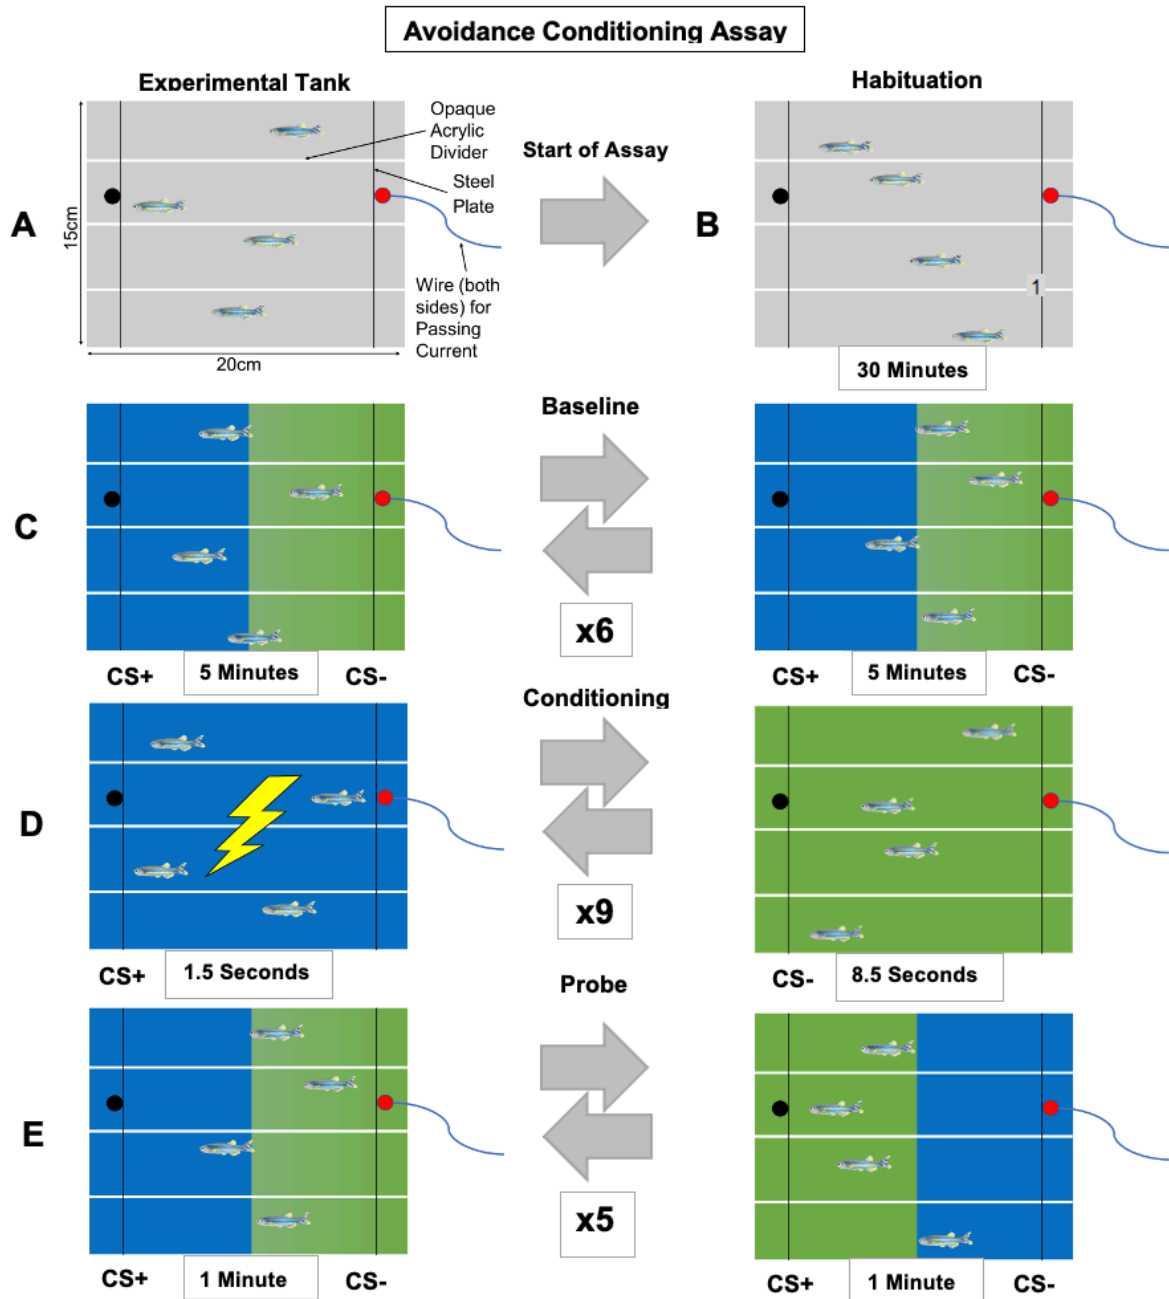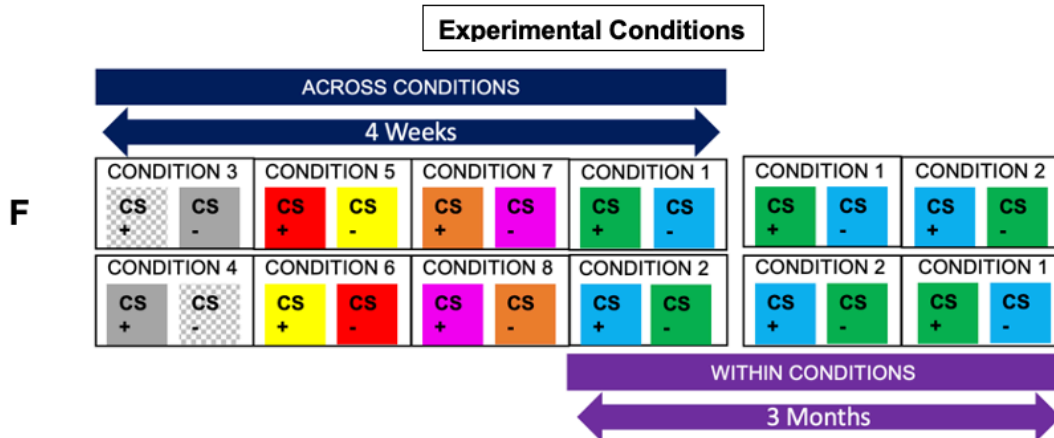

177 **Figure 1**

178 Colour conditions and aversive learning assay: (A) zebrafish are placed in the experimental  
179 tanks and (B) acclimated to the novel environment for 30-minutes; (C) in a 30-minute  
180 baseline period, initial CS± preference is established; (D) during the conditioning phase, fish  
181 are presented the CS+, then immediately subjected to a mild electric shock; and (E) in a 5-  
182 minute probe phase, learning is determined by fish spending less time in the CS+ when  
183 compared to the baseline. (F) Each condition is a combination of two visual cues (zones), one  
184 conditioned to a mild electric shock (CS+), the other is not (CS-). Across conditions eight  
185 colour conditions and eight sessions (each session is represented by a white box). Within  
186 conditions: two colour conditions and four sessions (in addition to two sessions in  
187 Experiment 1).

188

189 *Experimental Conditions*

190 We used a range of colour conditions to test aversive learning. Each condition was comprised  
191 of two visual cues, one aversive and one control (CS+ paired with CS-) (Figure 1F). We  
192 selected different colour combinations to use as visual cues for the zebrafish, which had  
193 either been worked in pre-existing assays or were reported to evoke a clear colour preference  
194 (Brock et al., 2017; Roy et al., 2019). As a result, we chose seven colours (green, blue, grey,  
195 orange, magenta, red, yellow) and 1 pattern (check; hereafter, this pattern is also referred to  
196 as a ‘colour’ with the others). We used four visual cue combinations (‘Check/Grey’,  
197 ‘Green/Blue’, ‘Red/Yellow’, ‘Magenta/Orange’) and their reverse (‘Grey/Check’,  
198 ‘Blue/Green’, ‘Yellow/Red’, ‘Orange/Magenta’) for a total of eight conditions. For example,  
199 the ‘Check/Grey’ condition used check pattern as the CS+ (cue associated with shock) and  
200 grey colour as the CS- (control cue); the ‘Grey/Check’ condition used grey colour as the CS+  
201 and check pattern as the CS-, and so on.

202

203 Prior to the experiment, we assigned fish into quartets (four fish that underwent trials within  
204 the same Zantiks unit/assay tank simultaneously) that systematically rotated between trials.  
205 The balanced design accounted for three potential confounding variables: the time of day  
206 (quartet rotated), Zantiks unit (quartet rotated), and lane position (individual within quartet  
207 rotated). We estimated repeatability in two different situations (across conditions and within a  
208 single condition). Across conditions, we ensured fish experienced trials from all four colour  
209 pairs before subjecting them to their exact reverse four conditions (with trials conducted over



210 four weeks in June and July 2019). We included this form of reverse learning to negate  
211 memory of the CS+ colour between trials, which may impact both baseline and probe colour  
212 preference. Within conditions, each zebrafish underwent trials in the ‘Blue/Green’ and  
213 ‘Green/Blue’ conditions a further two times (over two weeks in September 2019).

214

### 215 *Fish Size Measuring*

216 We took photos of each fish approximately one week after across-conditions trials and  
217 another set of photos approximately one week after within-conditions trials. We captured top  
218 down photos of live fish and measured fish in ImageJ (Schindelin et al., 2015). We used fish  
219 length (standard length) and width (at widest part of body) to calculate the ellipsoid size of  
220 the fish by using  $\pi \left( \left( \frac{\text{fish length}}{2} \right) \times \left( \frac{\text{fish width}}{2} \right) \right)$ . This controlled for a potential size effect  
221 resulting from loss of penetrance and effectiveness of the mild electric shock due to larger  
222 body size.

223

## 224 **Data Processing and Analysis**

225 All data processing and analyses were conducted in the *R* computing environment (version  
226 4.0.2; R Core Team, 2019). Linear mixed models were run using the *lme4* package (version  
227 1.1.21; Bates et al., 2014) in conjunction with the *lmerTest* package (version 3.1.2;  
228 Kuznetsova, Brockhoff, & Christensen, 2017), that provides Satterthwaite’s degrees of  
229 freedom correction. We obtained repeatability values via the *rptR* package (version 0.9.22;  
230 Stoffel et al., 2017) that uses the *lme4* package to run mixed models. Based on visual  
231 assessments of residual distributions, assumptions of normality and constant variance were  
232 not clearly violated. The Zantiks units recorded time spent in each CS zone, total distance  
233 travelled and how often fish changed zones. All code, and the raw and processed data, are  
234 available at: <https://osf.io/t95v3/>. We deemed our results statistically significant at the alpha  
235 = 0.05 level (or when 95% confidence intervals did not overlap zero).

236

### 237 *Quantifying Aversive Learning*

238 We determined learning by the difference in time that fish spent in the CS+ before and after  
239 the aversive experience. To analyse learning across all the sessions included in this study, we  
240 used the time difference (*‘difference’* = *time spent in the CS+ during baseline* – *time spent in*  
241 *the CS+ during probe*) as the response variable in a linear mixed-effects model (LMM) via  
242 the *lmer* function in the *lme4* package. We fitted individual ‘fish ID’ 96 levels) and

243 ‘experimental condition ID’ (8 levels, see Figure 1F) as random effects in the model. Also,  
244 we included the following fixed effects: (1) ‘sex’ (female or male) to investigate sex  
245 differences in learning, (2) ‘day’ since first trial, to account for time effects of sequential days  
246 on learning or learning via repeated trials (e.g., 1 being the first day and 8 being the 7<sup>th</sup> day  
247 from the first), (3) ‘fish size’ to control for fish’s response to conditioning which might be  
248 size dependent due to potential differences in body penetrance of a mild shock, (4) ‘learning’  
249 (initial and reverse) to find if learning was affected when the CS± of a condition were  
250 switched in successive trials. Note that we z-transformed the fixed effects ‘day’ and ‘fish  
251 size’ to make the intercept meaningful and slope estimates comparable (Schielzeth, 2010).

252

### 253 *Quantifying the Repeatability of Aversive Learning*

254 We obtained enhanced agreement repeatability (hereafter referred to as repeatability)  
255 estimates by incorporating statistically significant fixed effects from the model and retaining  
256 their variance in the denominator (Nakagawa & Schielzeth, 2010). We only fitted the random  
257 effect ‘fish ID’ and included ‘sex’ as a fixed effect. The R package *rptR* computes  
258 repeatability values using the within and between individual variance in linear mixed models  
259 fitted with restricted maximum likelihoods (Nakagawa & Schielzeth, 2010). Using *rptR*, we  
260 obtained standard errors and 95% confidence intervals (CIs), each model set to 10,000  
261 bootstrap samples. Following Bell (2009) and Wolak (2012), we categorised our repeatability  
262 results into low (<0.2), moderate (>0.2 - <0.4) and high (>0.4).

263

### 264 *Colour Preference and Repeatability*

265 An underlying assumption of our aversive learning assay was that zebrafish have the ability  
266 to discriminate between different colours. Therefore, from the baseline period (prior to  
267 aversive conditioning), we quantified underlying colour preferences (tendency to associate  
268 more heavily with one colour in a pair), and the consistency of individual differences in  
269 colour preference (i.e. repeatability of colour preference).

270

271 In each condition, preference for one colour was only compared to the other paired colour  
272 (e.g. preference for red is only relative to preference for yellow; see Figure 1F). Given we  
273 examined relative colour preference, preferences for either colour in a condition were the  
274 inverses of each other. Hence, to be able to determine colour preference for each colour, we  
275 grouped conditions of matching colours into four groups for analysis (e.g. Group 1,

276 ‘Red/Yellow’ & ‘Yellow/Red’; Group 2, ‘Green/Blue’ & ‘Blue/Green’; Group 3,  
277 ‘Check/Grey’ & ‘Grey/Check’; Group 4, ‘Orange/Magenta’ & ‘Magenta/Orange’).

278

279 To analyse relative colour preference, we ran LMMs for each group of colours using across  
280 conditions data. We used baseline colour preference as the response variable ‘baseline’ for  
281 these models. We fitted the random effect ‘fish ID’ in the models (Group 1 & 4, 97 levels;  
282 Group 2 & 3, 98 levels; levels differ because one fish died prior to completing all conditions).  
283 Further, we fitted the following fixed effects: (1) ‘day’ (days since first trial) to control for  
284 potential colour preference change with time, (2) ‘sex’ (male or female) to account for sex  
285 differences and (3) ‘learning’ (initial and reverse) to see the effect of reverse learning on  
286 colour preference. To determine the repeatability of colour preference, we used *rptR* mixed-  
287 effects models with the response variable ‘baseline’ to generate repeatability estimates. We  
288 did not find any fixed effects to be statistically significant, as such, they were excluded, and  
289 the colour preference models were fit with the random effect ‘fish ID’.

290

## 291 **Results**

### 292 *Do Zebrafish Show Appropriate Responses in an Aversive Learning Assay?*

293 Zebrafish spent more time avoiding the CS+ following conditioning, showing evidence of  
294 learning (across conditions: female average = 3.89 seconds per min, SE = 1.05,  $t_{33} = 3.65$ ,  $P$   
295  $< 0.001$ ; male average = 5.64 seconds per min, SE = 0.94,  $t_{22} = 5.21$ ,  $P < 0.001$ ; Figure 2B).  
296 Overall, males avoided the CS+ more than females, but this result was not statistically  
297 significant (1.75 seconds per min, SE = 0.90,  $t_{108} = 1.93$ ,  $P = 0.055$ ). Reverse learning had a  
298 non-significant slight negative effect (-1.11 seconds per min, SE = 1.03,  $t_{1008} = -1.07$ ,  $P =$   
299 0.281). All other fixed effects did not significantly impact learning (see Supplementary Table  
300 3 for all model outputs).

301

### 302 *Is Aversive Learning Repeatable Across and Within Conditions?*

303 We found very low repeatability across the eight different conditions ( $R = 0.04$ , 95% CI  
304 [0.001 - 0.097], Figure 3B). Within conditions, the repeatability (point-estimate) of the  
305 ‘Green/Blue’ condition was even lower than the across-condition estimate ( $R = 0.02$ , 95% CI  
306 [0 - 0.153]), while repeatability was higher in the ‘Blue/Green’ ( $R = 0.15$ , 95% CI [0.023 -  
307 0.278]; see also Supplementary Figure 3 for male and female estimates).

308

309 *Do Zebrafish Display Colour Preferences and is Preference Repeatable?*

310 Zebrafish showed strong relative colour preference in all four conditions (see Figure 2B). In  
311 addition, fish exhibited repeatable relative colour preferences which were highly consistent  
312 across all four conditions (Figure 3A; Grey:  $R = 0.45$ , 95% CI [0.276 - 0.607]; Green:  $R =$   
313  $0.45$ , 95% CI [0.278 - 0.604]; Red:  $R = 0.43$ , 95% CI [0.250 - 0.584]; Orange:  $R = 0.46$ ; 95%  
314 CI [0.283 - 0.605]; see Supplementary Table 1 and 2 for all repeatability estimates).

315

316

317

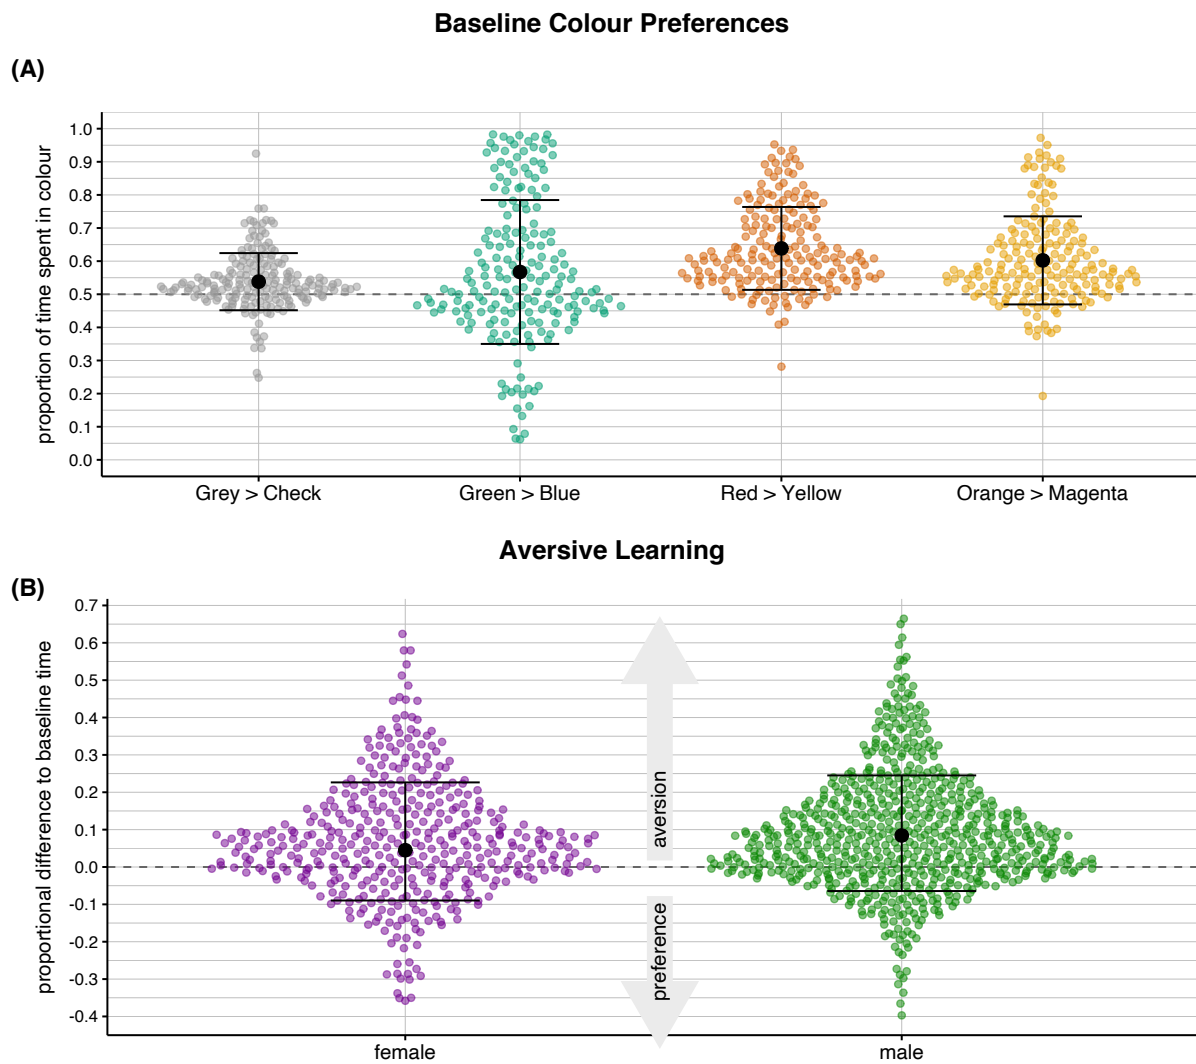

318

## 319 **Figure 2**

320 Violin plots for colour preferences and aversive learning. Smaller coloured points depict  
321 individual trials. Larger black points and error bars depict means and standard deviations of  
322 observations. (A) The top panel shows the tendency of zebrafish to favour one colour in a  
323 pair during the baseline period (i.e. before administration of electric shocks). The dashed  
324 horizontal line at 0.5 represents no colour preference (i.e. spending 30 seconds in each colour  
325 zone). (B) The bottom panel shows means and variation in aversive learning, split by sex  
326 (female = purple; male = green) when all the session data is combined. Points above the line  
327 at zero depict trials in which zebrafish spent less time in the aversive stimulus colour in the  
328 probe period (the colour associated with an electric shock) relative to the baseline period (i.e.  
329 aversive learning).

330

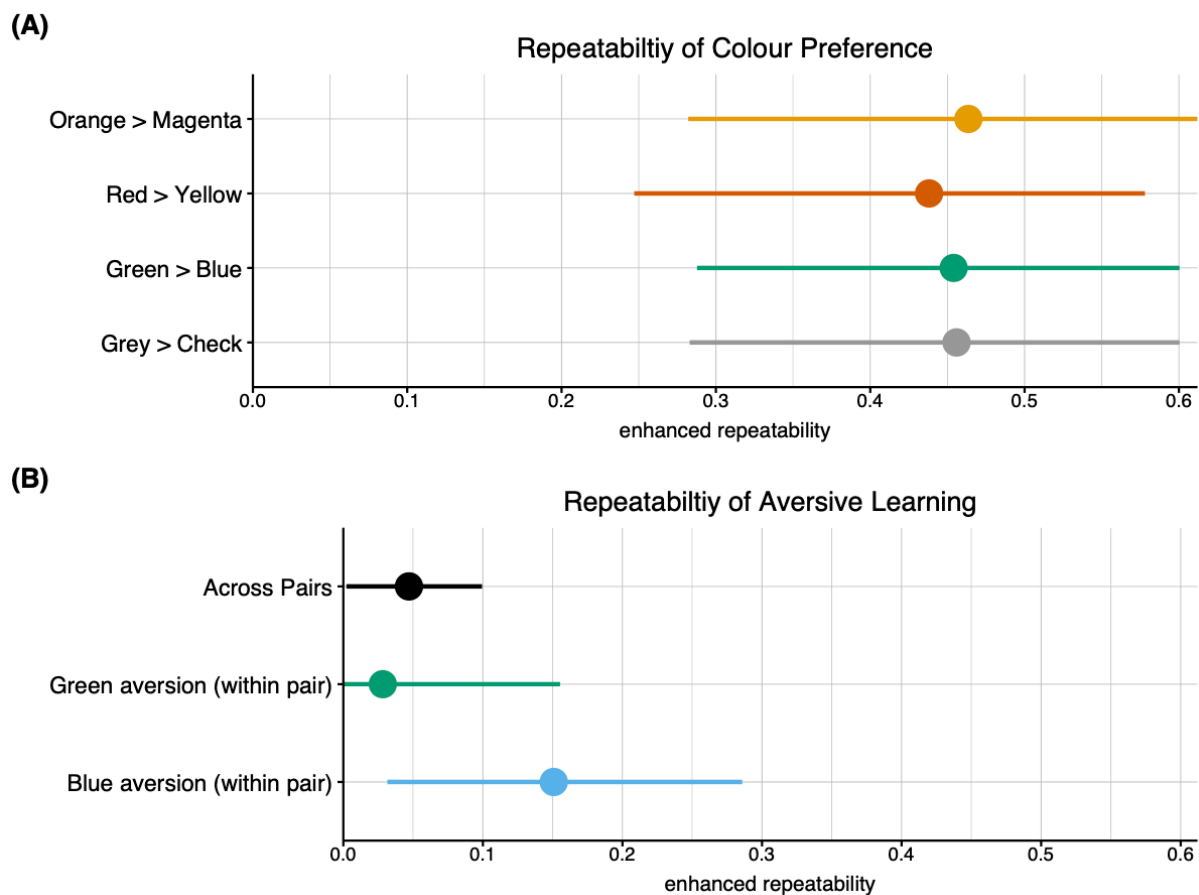

331

332 **Figure 3**

333 Repeatability of colour preference and aversive learning in zebrafish. Points and whiskers  
334 represent means and 95% confidence intervals via parametric bootstrapping. **(A)** Zebrafish  
335 show consistent individual differences in colour preferences (variation depicted in Figure 2).  
336 **(B)** Zebrafish show somewhat consistent individual differences in aversive learning within  
337 the Blue/Green pair, but not within the Green/Blue pair or across all colour combinations.  
338

## 339 Discussion

340 We investigated aversive learning in zebrafish and quantified repeatability in two scenarios.  
341 We first tested if fish displayed stable individual differences across different learning  
342 environments, equivalent to methods investigating ‘animal personality’ (i.e. consistent  
343 differences over time and contexts; Sih et al., 2004). We found negligible repeatability in  
344 aversive learning across conditions, despite individuals being able to discriminate between  
345 colours (as measured by a moderate repeatability of colour preferences). Then, we examined  
346 repeatability within two separate conditions, which is more consistent with the idea of  
347 ‘pseudo-repeatability’ (where consistency is inflated due to measurements under an identical  
348 condition; Niemelä & Dingemanse, 2017). Within two conditions, we found negligible  
349 repeatability in one condition (‘Green/Blue’  $R = 0.02$ ), and low repeatability in the other  
350 (‘Blue/Green’  $R = 0.15$ ; Figure 3B). Therefore, the substantial variation in aversive learning  
351 we observed was most likely driven by current (intrinsic or extrinsic) environmental factors,  
352 rather than additive genetic variance or canalized developmental differences (cf. Sznajder,  
353 Sabelis, & Egas, 2012)

354

355 Our results are surprising, given low to moderate repeatability of behaviour and cognition  
356 reported in two meta-analyses. For behaviour generally, Bell et al (2009) reported an average  
357 repeatability of  $R = 0.34$ . For cognitive performance, Cauchoix et al. (2018) found  $R = 0.15$ -  
358  $0.28$ , mostly based on temporal repeatability estimates from appetitive learning trials. Below  
359 we discuss four potential reasons why zebrafish in our experiment showed much less  
360 consistent individual differences in average learning compared to those previous estimates  
361 from Cauchoix et al. (2018) and Bell et al. (2009).

362

363 First, while zebrafish did demonstrate aversive learning, the effect was small, and in many  
364 trials, individuals did not seem to avoid the negative stimulus, perhaps due to not learning or  
365 quickly forgetting; on average, individuals spent 3.89 (females) and 5.64 (males) fewer  
366 seconds per minute respectively in the negatively associated colour following conditioning  
367 (Figure 2B). Low repeatability could therefore be caused by zebrafish being largely  
368 insensitive to the conditioning (i.e. bad aversive learners, or a weak assay). However, the fact  
369 that there was a population shift in the direction of aversive learning raises the question of  
370 why individuals who learnt in one trial did not maintain their performance across trials; if a  
371 particular subset of zebrafish had consistently learnt, or failed to learn, then we would have

372 detected higher repeatability. Further, while the behaviour change following aversive  
373 conditioning was modest, zebrafish learnt much faster (in 1.5 minutes) compared to previous  
374 assays with appetitive training (e.g., over 20 days; Brocks et al. 2017). As far as we are  
375 aware, no studies have investigated a relationship between the strength of associative learning  
376 and the magnitude of repeatability.

377

378 Second, past selection pressures on our study population may have eroded additive genetic  
379 variance associated with aversive learning, which was not restored in the intervening  
380 generations. In the wild, aversive learning could be under strong selection (e.g. to learn to  
381 evade predators), and individuals could be selected to learn from negative experiences as  
382 quickly as possible. Indeed, aversive learning could be under stronger selection than  
383 appetitive learning, as mortality costs of negative experiences can easily exceed opportunity  
384 costs of missing positive experiences. Stronger selective pressures could explain why we  
385 found substantially lower repeatability for aversive learning compared with previous results  
386 for appetitive learning. In a similar vein, a trait more closely associated with fitness (e.g.,  
387 aversive learning) tends to not be as heritable (thus, repeatable; cf. Dohm, 2002) than less  
388 fitness related traits (e.g., appetitive learning; Merilä & Sheldon, 2000). However, we cannot  
389 be sure that whether the performance of zebrafish in our laboratory assay accurately captures  
390 their ability to aversively learn in their natural habitat.

391

392 Third, some of the repeatability values in the meta-analyses by Cauchoix et al. (2018) and  
393 Bell et al. (2009) may have been overestimated. An inflated repeatability estimate, also  
394 known as ‘pseudo-repeatability’, is the result of within-individual variation being erroneously  
395 accredited to differences between individuals (Niemelä & Dingemanse, 2017; Westneat,  
396 Hatch, Wetzel, & Ensminger, 2011). Pseudo-repeatability occurs when the conditions  
397 between measurements are too similar (e.g., environmental conditions are unchanged or  
398 intervals between measurements are too short), and might explain why we found higher  
399 repeatability when zebrafish were measured repeatedly within a single condition  
400 (‘Blue/Green’;  $R = 0.15$ ), compared to across eight separate conditions (although no inflation  
401 was seen in ‘Green/Blue’). On closer inspection, some of studies in Cauchoix et al. (2018)  
402 and Bell et al. (2009) included testing conditions which did not change over the course of a  
403 study, similar to our within-condition estimates. Further, both Cauchoix (2018)  
404 predominately included studies with intervals under a week and Bell et al. (2009) almost all  
405 were under a year. Bell et al. (2009) reported that short intervals between measurements were



406 significantly associated with higher repeatability values in line with pseudo-repeatability.  
407 Relevantly, two recent studies on birdsong reported that associative learning among  
408 individuals was not repeatable between years, indicating that estimates obtained over short  
409 intervals may not be a true reflection of phenotypic constancy defined in animal personality  
410 (Soha et al., 2019; Zsebök et al., 2017).

411

412 Fourth, the meta-analytic repeatability estimates by Bell et al. (2009) might have been  
413 overestimated due to a potentially widespread publication bias in the literature reporting  
414 repeatability of behaviour (cf. Parker et al., 2016). Our across conditions repeatability  
415 estimate is markedly low in comparison to that of general behaviour founded in Bell et al.  
416 (2009;  $R = 0.34$ ) that only included published studies. Cauchoix et al. (2018) included many  
417 unpublished datasets ( $n = 38$ ) compared to published datasets ( $n = 6$ ); they mentioned that  
418 their unpublished datasets produced, overall, a lower repeatability estimate than that of the  
419 published studies. This finding is consistent with the pattern that larger effect sizes are more  
420 likely to be published. It is possible that publication bias has further contributed to an  
421 inflation of the overall repeatability estimates in the published literature. However, recent  
422 studies are increasingly reporting non-significant and low repeatability (e.g., Reichert et al.,  
423 2020; Vernouillet & Kelly, 2020). Therefore, an updated future meta-analysis may reveal a  
424 lower overall repeatability estimate in behaviour.

425

426 In conclusion, zebrafish did not show clear consistent between-individual differences in  
427 aversive learning. The low repeatability could potentially indicate that strong past selection  
428 pressure has almost driven aversive learning to fixation, because of the vital importance to  
429 learn to avoid danger. In addition, many researchers may have unknowingly included  
430 confounded pseudo-repeatability results in their studies. In turn, inflating published  
431 repeatability estimates and presenting the repeatability of behaviour and learning-associated  
432 behaviour higher than the 'true' repeatability of behaviour. Further, a bias to withhold non-  
433 significant findings from publishing may have exacerbated this inflation in the literature. We  
434 contend that these issues can be diminished in future behavioural research by controlling for  
435 confounding effects and reporting every estimate of behavioural traits, whether repeatable or  
436 not.

## 437 **Acknowledgement**

438 We are grateful for the staff at the Biological Testing Facility, Garvan Institute of Medical  
439 Research for their support and husbandry of zebrafish. This study was supported by ARC  
440 (Australian Research Council) Discovery grant (DP180100818). No competing interests  
441 declared.

## 442 **References**

- 443 Ashton, B. J., Ridley, A. R., Edwards, E. K., & Thornton, A. (2018). Cognitive performance  
444 is linked to group size and affects fitness in Australian magpies. *Nature*, *554*(7692),  
445 364–367. <https://doi.org/10.1038/nature25503>
- 446 Baker, M. R., & Wong, R. Y. (2019). Contextual fear learning and memory differ between  
447 stress coping styles in zebrafish. *Scientific Reports*, *9*(1). [https://doi.org/10.1038/s41598-](https://doi.org/10.1038/s41598-019-46319-0)  
448 019-46319-0
- 449 Bates, D., Mächler, M., Bolker, B., & Walker, S. (2014). Fitting linear mixed-effects models  
450 using lme4. *ArXiv Preprint ArXiv:1406.5823*.
- 451 Bell, A. M., Hankison, S. J., Laskowski, K. L., Bell, Alison M, Shala J. Hankison, and K. L.  
452 L., Bell, A. M., Hankison, S. J., & Laskowski, K. L. (2009). The repeatability of  
453 behaviour: a meta-analysis. *Animal Behaviour*, *77*(4), 771–783.  
454 <https://doi.org/10.1016/j.anbehav.2008.12.022>.Bell
- 455 Boogert, N. J., Madden, J. R., Morand-Ferron, J., & Thornton, A. (2018). Measuring and  
456 understanding individual differences in cognition. *Philosophical Transactions of the*  
457 *Royal Society B: Biological Sciences*, *373*(1756). <https://doi.org/10.1098/rstb.2017.0280>
- 458 Brock, A. J., Sudwarts, A., Daggett, J., Parker, M. O., & Brennan, C. H. (2017). A fully  
459 automated computer based Skinner box for testing learning and memory in zebrafish.  
460 *BioRxiv*, 110478. <https://doi.org/10.1101/110478>
- 461 Cauchoix, M., Chow, P. K. Y. K. Y., Van Horik, J. O. O., Atance, C. M. M., Barbeau, E. J.  
462 J., Barragan-Jason, G., ... Morand-Ferron, J. (2018). The repeatability of cognitive  
463 performance: A meta-analysis. *Philosophical Transactions of the Royal Society B:*  
464 *Biological Sciences*, *373*(1756). <https://doi.org/10.1098/rstb.2017.0281>
- 465 Dohm, M. R. R. (2002). Repeatability estimates do not always set an upper limit to  
466 heritability. *Functional Ecology*, *16*(2), 273–280. [https://doi.org/10.1046/j.1365-](https://doi.org/10.1046/j.1365-2435.2002.00621.x)  
467 2435.2002.00621.x
- 468 Fangmeier, M. L., Noble, D. W. A., O’Dea, R. E., Usui, T., Lagisz, M., Hesselon, D., &

- 469 Nakagawa, S. (2018). Computer Animation Technology in Behavioral Sciences: A  
470 Sequential, Automatic, and High-Throughput Approach to Quantifying Personality in  
471 Zebrafish (*Danio rerio*). *Zebrafish*, *15*(2), 206–210.  
472 <https://doi.org/10.1089/zeb.2017.1532>
- 473 Fontana, B D, Cleal, M., Clay, J. M., & Parker, M. O. (2019). Zebrafish (*Danio rerio*)  
474 behavioral laterality predicts increased short-term avoidance memory but not stress-  
475 reactivity responses. *Animal Cognition*. <https://doi.org/10.1007/s10071-019-01296-9>
- 476 Fontana, Barbara Dotto, Cleal, M., Clay, J., & Parker, M. O. (2019). Zebrafish (*Danio rerio*)  
477 behavioral laterality predicts increased short-term avoidance memory but not stress-  
478 reactivity responses. *BioRxiv*, 565309. <https://doi.org/10.1101/565309>
- 479 Gerlai, R. (2016). Learning and memory in zebrafish (*Danio rerio*). *Methods in Cell Biology*,  
480 *134*, 551–586. <https://doi.org/10.1016/bs.mcb.2016.02.005>
- 481 Hohn, C., & Petrie-Hanson, L. (2013). Evaluation of visible implant elastomer tags in  
482 zebrafish (*Danio rerio*). *Biology Open*, *2*(12), 1397–1401.  
483 <https://doi.org/10.1242/bio.20136460>
- 484 Holtmann, B., Lagisz, M., & Nakagawa, S. (2017). Metabolic rates, and not hormone levels,  
485 are a likely mediator of between-individual differences in behaviour: a meta-analysis.  
486 *Functional Ecology*, *31*(3), 685–696. <https://doi.org/10.1111/1365-2435.12779>
- 487 Huebner, F., Fichtel, C., & Kappeler, P. M. (2018). Linking cognition with fitness in a wild  
488 primate: Fitness correlates of problem-solving performance and spatial learning ability.  
489 *Philosophical Transactions of the Royal Society B: Biological Sciences*, *373*(1756).  
490 <https://doi.org/10.1098/rstb.2017.0295>
- 491 Kaneko, S., Masuda, R., & Yamashita, Y. (2019). Memory retention capacity using two  
492 different training methods, appetitive and aversive learning, in juvenile red sea bream  
493 *Chrysophrys major*. *Journal of Fish Biology*, *94*(2), 231–240.  
494 <https://doi.org/10.1111/jfb.13876>
- 495 Kawecki, T. J. (2010). Evolutionary ecology of learning: Insights from fruit flies. *Population*  
496 *Ecology*, *52*(1), 15–25. <https://doi.org/10.1007/s10144-009-0174-0>
- 497 Kenney, J. W., Scott, I. C., Josselyn, S. A., & Frankland, P. W. (2017). Contextual fear  
498 conditioning in zebrafish. *Learning and Memory*, *24*(10), 516–523.  
499 <https://doi.org/10.1101/lm.045690.117>
- 500 Krebs, J. R., & Davies, N. B. (1987). An introduction to behavioural ecology, 2nd ed. In *An*  
501 *introduction to behavioural ecology, 2nd ed.* Sunderland, MA, US: Sinauer Associates.
- 502 Kuznetsova, A., Brockhoff, P. B., & Christensen, R. H. B. (2017). lmerTest Package: Tests in

- 503 Linear Mixed Effects Models . *Journal of Statistical Software*, 82(13).  
504 <https://doi.org/10.18637/jss.v082.i13>
- 505 Lessells, C. M., & Boag, P. T. (1987). Unrepeatable Repeatabilities: A Common Mistake.  
506 *The Auk*, 104(1), 116–121. <https://doi.org/10.2307/4087240>
- 507 Merilä, J., & Sheldon, B. C. (2000). Lifetime reproductive success and heritability in nature.  
508 *American Naturalist*, 155(3), 307–310. <https://doi.org/10.2307/3078867>
- 509 Meshalkina, D. A., Kizlyk, M. N., Kysil, E. V., Collier, A. D., Echevarria, D. J., Abreu, M.  
510 S., ... Kalueff, A. V. (2017). Understanding zebrafish cognition. *Behavioural Processes*,  
511 Vol. 141, pp. 229–241. <https://doi.org/10.1016/j.beproc.2016.11.020>
- 512 Nakagawa, S., & Schielzeth, H. (2010, November). Repeatability for Gaussian and non-  
513 Gaussian data: A practical guide for biologists. *Biological Reviews*, Vol. 85, pp. 935–  
514 956. <https://doi.org/10.1111/j.1469-185X.2010.00141.x>
- 515 Namekawa, I., Moenig, N. R., & Friedrich, R. W. (2018). Rapid olfactory discrimination  
516 learning in adult zebrafish. *Experimental Brain Research*, 236(11), 2959–2969.  
517 <https://doi.org/10.1007/s00221-018-5352-x>
- 518 Niemelä, P. T. T., & Dingemans, N. J. J. (2017). Individual versus pseudo-repeatability in  
519 behaviour: Lessons from translocation experiments in a wild insect. *Journal of Animal*  
520 *Ecology*, 86(5), 1033–1043. <https://doi.org/10.1111/1365-2656.12688>
- 521 Norton, W., & Bally-Cuif, L. (2010). Adult zebrafish as a model organism for behavioural  
522 genetics. *BMC Neuroscience*, Vol. 11. <https://doi.org/10.1186/1471-2202-11-90>
- 523 Parker, T. H., Forstmeier, W., Koricheva, J., Fidler, F., Hadfield, J. D., Chee, Y. E., ...  
524 Nakagawa, S. (2016). Transparency in Ecology and Evolution: Real Problems, Real  
525 Solutions. *Trends in Ecology and Evolution*, Vol. 31, pp. 711–719.  
526 <https://doi.org/10.1016/j.tree.2016.07.002>
- 527 Pasquier, G., & Grüter, C. (2016). Individual learning performance and exploratory activity  
528 are linked to colony foraging success in a mass-recruiting ant. *Behavioral Ecology*, 1(1),  
529 arw079. <https://doi.org/10.1093/beheco/arw079>
- 530 Raine, N. E., & Chittka, L. (2008). The correlation of learning speed and natural foraging  
531 success in bumble-bees. *Proceedings of the Royal Society B: Biological Sciences*,  
532 275(1636), 803–808. <https://doi.org/10.1098/rspb.2007.1652>
- 533 Reichert, M. S., Crofts, S. J., Davidson, G. L., Firth, J. A., Kulahci, I. G., Quinn, J. L., &  
534 Quinn, J. L. (2020). *Multiple factors affect discrimination learning performance , but*  
535 *not between-individual variation , in wild mixed-species flocks of birds.*
- 536 Roy, T., Suriyampola, P. S. P. S., Flores, J., López, M., Hickey, C., Bhat, A., & Martins, E.

- 537 P. E. P. (2019). *Color preferences affect learning in zebrafish, Danio rerio*. 9(1), 14531.  
538 <https://doi.org/10.1038/s41598-019-51145-5>
- 539 Schielzeth, H. (2010). Simple means to improve the interpretability of regression coefficients.  
540 *Methods in Ecology and Evolution*, 1(2), 103–113. Retrieved from  
541 <http://doi.wiley.com/10.1111/j.2041-210X.2010.00012.x>
- 542 Schindelin, J., Rueden, C. T., Hiner, M. C., & Eliceiri, K. W. (2015). The ImageJ ecosystem:  
543 An open platform for biomedical image analysis. *Molecular Reproduction and*  
544 *Development*, 82(7–8), 518–529. <https://doi.org/10.1002/mrd.22489>
- 545 Shaw, R. C., Mackinlay, R. D., Clayton, N. S., Burns, K. C., Shaw, R. C., Mackinlay, R. D.,  
546 ... Burns, K. C. (2019). Memory Performance Influences Male Reproductive Success in  
547 a Wild Bird Memory Performance Influences Male Reproductive Success in a Wild  
548 Bird. *Current Biology*, 29(9), 1498-1502.e3. <https://doi.org/10.1016/j.cub.2019.03.027>
- 549 Sih, A., Bell, A., & Johnson, J. C. (2004, July). Behavioral syndromes: An ecological and  
550 evolutionary overview. *Trends in Ecology and Evolution*, Vol. 19, pp. 372–378.  
551 <https://doi.org/10.1016/j.tree.2004.04.009>
- 552 Skinner, B. F. (1984). THE EVOLUTION OF BEHAVIOR. *Journal of the Experimental*  
553 *Analysis of Behavior*, 41(2), 217–221. <https://doi.org/10.1901/jeab.1984.41-217>
- 554 Soha, J. A., Peters, S., Anderson, R. C., Searcy, W. A., & Nowicki, S. (2019). Performance  
555 on tests of cognitive ability is not repeatable across years in a songbird. *Animal*  
556 *Behaviour*. <https://doi.org/10.1016/j.anbehav.2019.09.020>
- 557 Stoffel, M. A., Nakagawa, S., & Schielzeth, H. (2017). rptR: repeatability estimation and  
558 variance decomposition by generalized linear mixed-effects models. *Methods in Ecology*  
559 *and Evolution*, 8(11), 1639–1644. <https://doi.org/10.1111/2041-210X.12797>
- 560 Sznajder, B., Sabelis, M. W., & Egas, M. (2012). How Adaptive Learning Affects Evolution:  
561 Reviewing Theory on the Baldwin Effect. *Evolutionary Biology*, 39(3), 301–310.  
562 <https://doi.org/10.1007/s11692-011-9155-2>
- 563 Team, R. C. (2017). *R: A Language and Environment for Statistical Computing*. Retrieved  
564 from <http://www.r-project.org/>
- 565 Thomson, H. R., Lamb, S. D., Besson, A. A., & Johnson, S. L. (2020). Long-term  
566 repeatability of behaviours in zebrafish (*Danio rerio*). *Ethology*, (October 2019), 803–  
567 811. <https://doi.org/10.1111/eth.13038>
- 568 Vernouillet, A., & Kelly, D. M. (2020). Individual exploratory responses are not repeatable  
569 across time or context for four species of food-storing corvid. *Scientific Reports*, 10(1),  
570 1–11. <https://doi.org/10.1038/s41598-019-56138-y>

- 571 Westneat, D. F., Hatch, M. I., Wetzel, D. P., & Ensminger, A. L. (2011). Individual variation  
572 in parental care reaction norms: Integration of Personality and plasticity. *American*  
573 *Naturalist*, 178(5), 652–667. <https://doi.org/10.1086/662173>
- 574 Wolak, M. E. M. E. E., Fairbairn, D. J. D. J. J., & Paulsen, Y. R. Y. R. R. (2012). Guidelines  
575 for estimating repeatability. *Methods in Ecology and Evolution*, 3(1), 129–137.  
576 <https://doi.org/10.1111/j.2041-210X.2011.00125.x>
- 577 Zsebők, S., Herczeg, G., Blázi, G., Laczi, M., Nagy, G., Szász, E., ... Garamszegi, L. Z.  
578 (2017). Short- and long-term repeatability and pseudo-repeatability of bird song:  
579 sensitivity of signals to varying environments. *Behavioral Ecology and Sociobiology*,  
580 71(10). <https://doi.org/10.1007/s00265-017-2379-0>
- 581

1 **Supplementary Information (SI)**

2

3 The Repeatability of Aversive Learning in Zebrafish (*Danio Rerio*)

4

5 **Dominic Mason<sup>1</sup>**

6

7 <sup>1</sup>*Evolution & Ecology Research Centre, School of Biological, Earth and Environmental*  
8 *Sciences, University of New South Wales, Sydney, NSW, Australia.*

9  
10

11  
12  
13  
14  
15  
16  
17  
18  
19  
20  
21  
22  
23  
24  
25  
26  
27  
28  
29  
30  
31  
32  
33  
34  
35  
36  
37  
38  
39  
40  
41  
42  
43  
44

## **Supplementary Methods**

### *Zantiks Experimental Units*

We used Zantiks AD fully automated units to conduct our behavioural experiments (Zantiks Ltd., Cambridge, UK; Supplementary Figure 1). The design enabled comprehensive standardised cognitive assays on zebrafish. The boxes' capabilities include infrared tracking, a stimulus screen, feeding mechanisms, removable tanks with modifiable inserts, an in-built computer, console interface and video recording. They were well equipped to conduct simple experimental manipulation and provide a range of stimuli (colours, patterns or images) to measure behavioural responses.

During experiments, we placed portable tanks (length 20cm: height 14cm: width 15cm; 2.6L system water; see Supplementary Figure 2, picture C) containing the fish onto the screens inside the units (see Supplementary Figure 2, picture B). We presented experimental stimuli via the screen through the transparent base of the tank. Fish location co-ordinates were tracked via an inbuilt infrared (IR) camera situated at the ceiling of the unit and another IR source underneath the screen. A basal screen enabled a near completely closed system inhibiting external disturbances.

### *Pilot Experiments*

To find the best parameters to use in the avoidance task, we carried out numerous pilot assays. Specifically, we examined three parameters: stimulus type (colour or pattern), assay length and voltage. Our aim was to find the shortest assay length and lowest voltage suitable to yield a behavioural response from the fish. At the same time we determined which stimuli (colours) would be ideal, testing stimuli used in the literature (Brock et al., 2017) and two colours that we did not find in the literature, orange and magenta.

With guidance from previous research (Brock et al., 2017), we conducted preliminary tests to identify the lowest voltage setting required to yield an adequate learning response. We tested three settings: five, seven and nine volts, each applied nine times per trial. The seven-volt setting elicited the most fish avoidance for the CS+ in the probe stage (see Supplementary Figure 4). Based on this finding we used seven volts applied nine times as the US in the conditioning phase for our experiments.



45 The previously developed assay by Brock et al. (2017) comprised of 3 stages: baseline,  
46 conditioning and probe. We extensively tested the three stages to decide the optimal length  
47 for each. Akin to other studies, the baseline and conditioning stages remained the same length  
48 (Brock et al., 2017; Fontana et al., 2019). However, we lengthened the probe period from two  
49 to five minutes to provide a wider range for potential analysis. Further, we introduced an  
50 acclimation stage to ensure a consistent association response from the fish (Thomson et al.,  
51 2020). The acclimation stage is absent in some studies, although when present can range in  
52 length from 10-minutes (Baker & Wong, 2019; Kenney et al., 2017) to over the course of  
53 multiple days (Kaneko, Masuda, & Yamashita, 2019; Namekawa, Moenig, & Friedrich,  
54 2018). Following the data collected during our pilot assays, we found a 30-minute acclimation  
55 period just prior to data collection afforded the best association response.

56

57 Our pilot results indicated a steep decline in association response after two minutes in the  
58 probe period. Although these results aligned with the literature (Brock et al., 2017 2-minute  
59 probe; Fontana et al., 2019 1-minute probe) we integrated an extended probe period (the  
60 probe phase above) to verify if fish would display a similar deterioration. As expected, the  
61 fish exhibited a corresponding drop in association response after two minutes. Consequently,  
62 for our analysis we confined the extended probe period to two minutes since the ensuing  
63 deterioration may indicate memory loss or habituation to the CS+ post conditioning or a new  
64 learning event.

65

## 66 **Supplementary Notes**

### 67 *Sex Differences in Repeatability*

68 We found males we more generally more repeatable than females (Figure S3) in aversive  
69 learning. We found this result across conditions (males, sample size = 63,  $R = 0.06$ , 95% CI  
70 [0.007 - 0.091]; females, sample size = 46,  $R = 0.00$ , 95% CI [0 - 0.055]) and in the  
71 'Blue/Green' condition (males, sample size = 62,  $R = 0.23$ , 95% CI [0.050 - 0.374]; females,  
72 sample size = 37,  $R = 0.02$ , 95% CI [0 - 0.195]). This result was not anticipated since females  
73 are reported to be more repeatable than males in behaviour (Bell et al., 2009). We found no  
74 statistically significant difference in repeatability between males and females, displayed by no  
75 overlap over zero in bootstrap distribution displayed in Supplementary Figure 4.

76

77 In relative colour preference, we found males were more repeatable than female in the colours  
78 red, grey and orange but not green. Since we are the first to assess the repeatability of colour  
79 preference in zebrafish, we cannot compare to the literature, however, the sex differences in  
80 colour preference repeatability are mostly consistent with those in the repeatability of aversive  
81 learning.  
82

83 **Supplementary Tables**

84 **Supplementary Table 1**

85 Repeatability values for different conditions with bootstrapped 95% confidence intervals. All  
 86 conditions display sexes mixed at the top then male and female results. Estimates with CIs  
 87 that do not overlap zero are presented in bold.

88

| Conditions        | Repeatability ( <i>R</i> ) | 95% Confidence Interval |
|-------------------|----------------------------|-------------------------|
| Across            | 0.047                      | 0.007 - 0.091           |
| Across Male       | 0.069                      | 0.014 - 0.154           |
| Across Female     | 0                          | 0 - 0.055               |
| -----             |                            |                         |
| Green/Blue        | 0.028                      | 0 - 0.137               |
| Green/Blue Male   | 0.039                      | 0 - 0.222               |
| Green/Blue Female | 0.016                      | 0 - 0.203               |
| -----             |                            |                         |
| Blue/Green        | 0.150                      | 0.023 - 0.308           |
| Blue/Green Male   | 0.232                      | 0.050 - 0.374           |
| Blue/Green Female | 0.022                      | 0 - 0.195               |
| -----             |                            |                         |
| First             | 0                          | 0 - 0.189               |
| First Male        | 0                          | 0 - 0.227               |
| First Female      | 0.029                      | 0 - 0.383               |
| -----             |                            |                         |
| Second            | 0.012                      | 0 - 0.200               |
| Second Male       | 0                          | 0 - 0.000               |
| Second Female     | 0.073                      | 0 - 0.419               |
| -----             |                            |                         |

|              |       |           |
|--------------|-------|-----------|
| Third        | 0     | 0 - 0.222 |
| Third Male   | 0     | 0 - 0.275 |
| Third Female | 0     | 0 - 0.355 |
| All          | 0.013 | 0 - 0.072 |
| All Male     | 0.046 | 0 - 0.141 |
| All Female   | 0     | 0 - 0.100 |

90 **Supplementary Table 2**

91 Repeatability estimates of relative colour preference with bootstrapped 95% CIs for red,  
 92 green, grey and orange. Male and female preference included. Estimates with CIs that do not  
 93 overlap zero are presented in bold.

94

| Colour        | Repeatability ( <i>R</i> ) | 95% Confidence Interval |
|---------------|----------------------------|-------------------------|
| Red           | 0.438                      | 0.250 - 0.584           |
| Red Male      | 0.492                      | 0.288 - 0.656           |
| Red Female    | 0.331                      | 0.009 - 0.586           |
| .....         |                            |                         |
| Green         | 0.454                      | 0.278 - 0.604           |
| Green Male    | 0.434                      | 0.215 - 0.614           |
| Green Female  | 0.490                      | 0.203 - 0.702           |
| .....         |                            |                         |
| Grey          | 0.455                      | 0.276 - 0.607           |
| Grey Male     | 0.499                      | 0.309 - 0.657           |
| Grey Female   | 0.391                      | 0.056 - 0.635           |
| .....         |                            |                         |
| Orange        | 0.463                      | 0.283 - 0.605           |
| Orange Male   | 0.519                      | 0.280 - 0.681           |
| Orange Female | 0.411                      | 0.083 - 0.649           |

95

96 **Supplementary Table 3**

97 The outputs of fixed and random effects from the across conditions aversive learning mixed  
 98 effect model. Significant results are displayed in bold.

| <i>Predictors</i>                  | <i>Estimates</i> | <b>difference</b> |              |
|------------------------------------|------------------|-------------------|--------------|
|                                    |                  | <i>CI</i>         | <i>p</i>     |
| (Intercept)                        | 3.90             | 1.58 – 6.22       | <b>0.001</b> |
| sex [male]                         | 1.75             | -0.02 – 3.52      | 0.053        |
| session                            | 0.37             | -0.71 – 1.45      | 0.501        |
| fish_size                          | 0.30             | -0.54 – 1.14      | 0.479        |
| learning_combined<br>[reverse]     | -1.12            | -3.15 – 0.92      | 0.282        |
| <b>Random Effects</b>              |                  |                   |              |
| $\sigma^2$                         | 79.76            |                   |              |
| $\tau_{00}$ fishID                 | 4.43             |                   |              |
| $\tau_{00}$ exp                    | 3.23             |                   |              |
| ICC                                | 0.09             |                   |              |
| $N_{exp}$                          | 8                |                   |              |
| $N_{fishID}$                       | 96               |                   |              |
| Observations                       | 1106             |                   |              |
| Marginal $R^2$ / Conditional $R^2$ | 0.007 / 0.094    |                   |              |

100 **Supplementary Table 4**

101 The outputs of fixed and random effects from the across conditions red colour preference  
 102 mixed effect model. Significant results are displayed in bold.

103

| BASELINE                           |               |               |                  |
|------------------------------------|---------------|---------------|------------------|
| Predictors                         | Estimates CI  |               | p                |
| (Intercept)                        | 36.35         | 33.03 – 39.67 | <b>&lt;0.001</b> |
| day                                | -1.05         | -3.80 – 1.71  | 0.457            |
| sex [male]                         | 1.51          | -1.13 – 4.15  | 0.262            |
| learning [reverse]                 | 2.05          | -3.09 – 7.18  | 0.435            |
| <b>Random Effects</b>              |               |               |                  |
| $\sigma^2$                         | 32.10         |               |                  |
| $\tau_{00}$ fishID                 | 24.72         |               |                  |
| ICC                                | 0.44          |               |                  |
| $N_{\text{fishID}}$                | 98            |               |                  |
| Observations                       | 192           |               |                  |
| Marginal $R^2$ / Conditional $R^2$ | 0.014 / 0.443 |               |                  |

104

105 **Supplementary Table 5**

106 The outputs of fixed and random effects from the across conditions green colour preference  
 107 mixed effect model. Significant results are displayed in bold.

108

| BASELINE                           |               |               |                  |
|------------------------------------|---------------|---------------|------------------|
| Predictors                         | Estimates     | CI            | p                |
| (Intercept)                        | 36.27         | 30.31 – 42.22 | <b>&lt;0.001</b> |
| day                                | 1.35          | -3.52 – 6.23  | 0.586            |
| sex [male]                         | 0.51          | -4.13 – 5.16  | 0.829            |
| learning [reverse]                 | -5.11         | -14.15 – 3.93 | 0.268            |
| Random Effects                     |               |               |                  |
| $\sigma^2$                         | 90.08         |               |                  |
| $\tau_{00}$ fishID                 | 80.59         |               |                  |
| ICC                                | 0.47          |               |                  |
| $N_{\text{fishID}}$                | 97            |               |                  |
| Observations                       | 192           |               |                  |
| Marginal $R^2$ / Conditional $R^2$ | 0.013 / 0.479 |               |                  |

109



110 **Supplementary Table 6**

111 The outputs of fixed and random effects from the across conditions check colour preference  
 112 mixed effect model. Significant results are displayed in bold.

113

| BASELINE                           |               |               |                  |
|------------------------------------|---------------|---------------|------------------|
| Predictors                         | Estimates     | CI            | p                |
| (Intercept)                        | 32.81         | 30.54 – 35.07 | <b>&lt;0.001</b> |
| day                                | 0.42          | -1.51 – 2.36  | 0.667            |
| sex [male]                         | -0.63         | -2.47 – 1.21  | 0.503            |
| learning [reverse]                 | -0.26         | -3.85 – 3.34  | 0.889            |
| Random Effects                     |               |               |                  |
| $\sigma^2$                         | 14.61         |               |                  |
| $\tau_{00}$ fishID                 | 12.47         |               |                  |
| ICC                                | 0.46          |               |                  |
| $N_{\text{fishID}}$                | 97            |               |                  |
| Observations                       | 192           |               |                  |
| Marginal $R^2$ / Conditional $R^2$ | 0.007 / 0.464 |               |                  |

114

115 **Supplementary Table 7**

116 The outputs of fixed and random effects from the across conditions orange colour preference  
 117 mixed effect model. Significant results are displayed in bold.

118

| BASELINE                           |               |               |        |
|------------------------------------|---------------|---------------|--------|
| Predictors                         | Estimates     | CI            | p      |
| (Intercept)                        | 37.08         | 33.75 – 40.41 | <0.001 |
| day                                | 0.73          | -1.95 – 3.41  | 0.592  |
| sex [male]                         | -1.04         | -3.86 – 1.78  | 0.469  |
| learning [reverse]                 | -0.59         | -5.56 – 4.39  | 0.818  |
| Random Effects                     |               |               |        |
| $\sigma^2$                         | 36.39         |               |        |
| $\tau_{00}$ fishID                 | 27.15         |               |        |
| ICC                                | 0.43          |               |        |
| $N_{\text{fishID}}$                | 98            |               |        |
| Observations                       | 184           |               |        |
| Marginal $R^2$ / Conditional $R^2$ | 0.008 / 0.432 |               |        |

119

120 **Supplementary Figures**

121

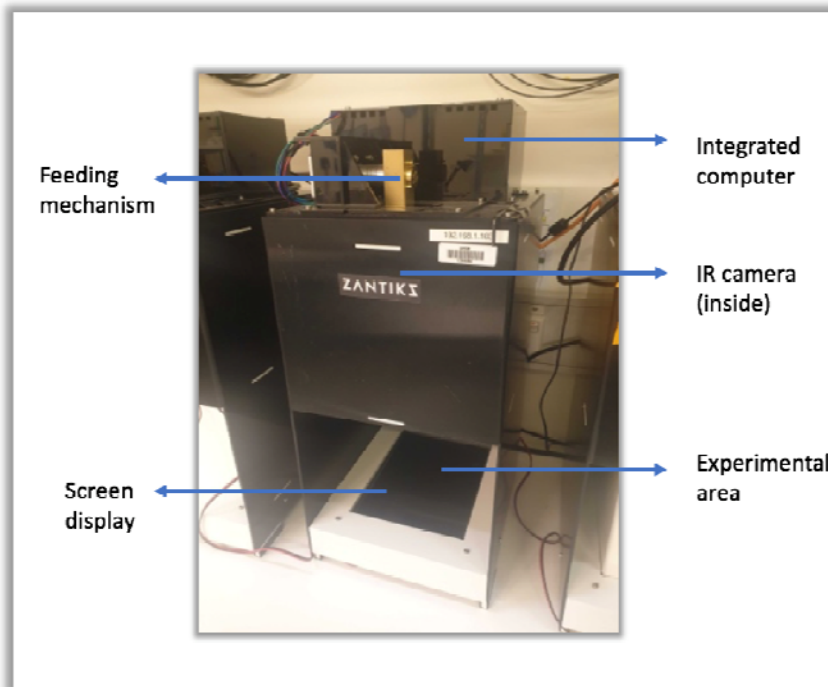

122

123 **Supplementary Figure 1**

124 Zantiks AD unit. Fully automated experimental box with tracking (IR camera), recording  
125 (integrated computer interfaced via console, see Supplementary Figure 2E below) among  
126 other capabilities with an open compartment where the assay was conducted, with a screen  
127 that holds the tank with experimental subjects during trials.

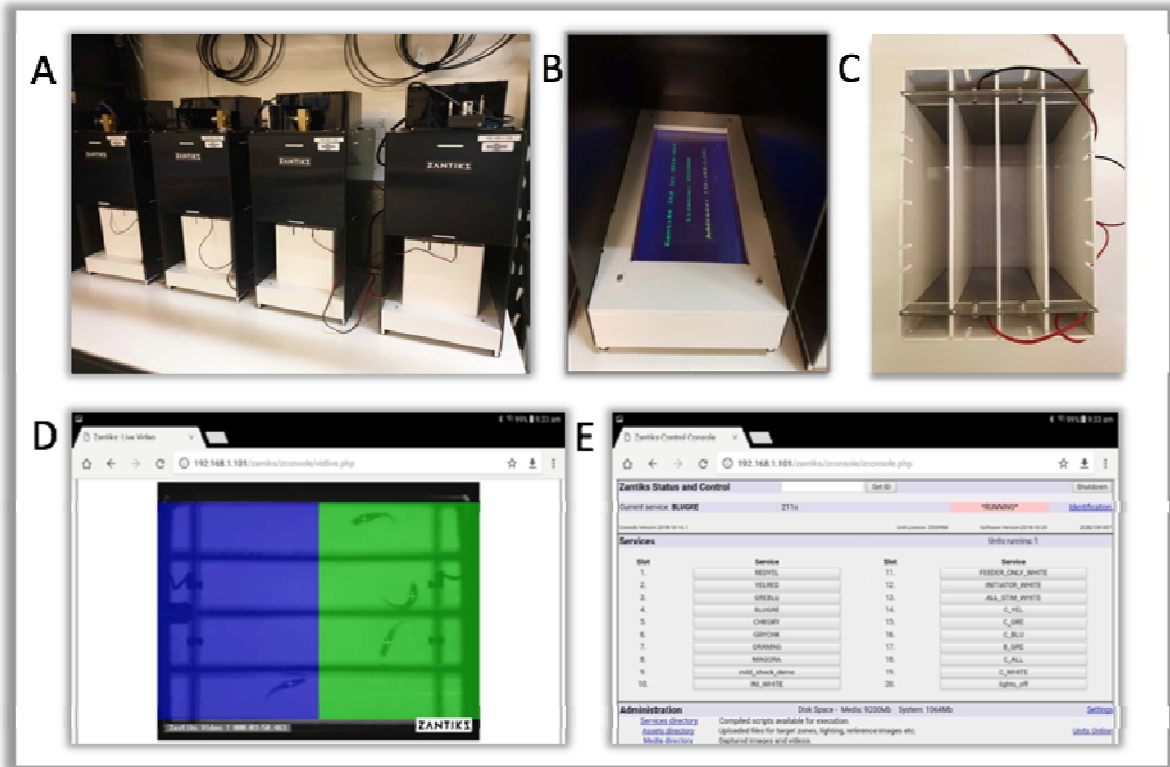

129 **Supplementary Figure 2**

130 Automated conditioning setup. A: All four Zantiks AD experimental units. B: Stimulus screen  
 131 programmed to present a variety of colours, patterns and images. C: Tank organised for  
 132 aversive experiment with 4 lanes and 2 mild electric shock plates. D: View of example assay,  
 133 depicting fish tracking and overlay of perimeters (CS zones). E: Control console for ease of  
 134 interface with the AD units.

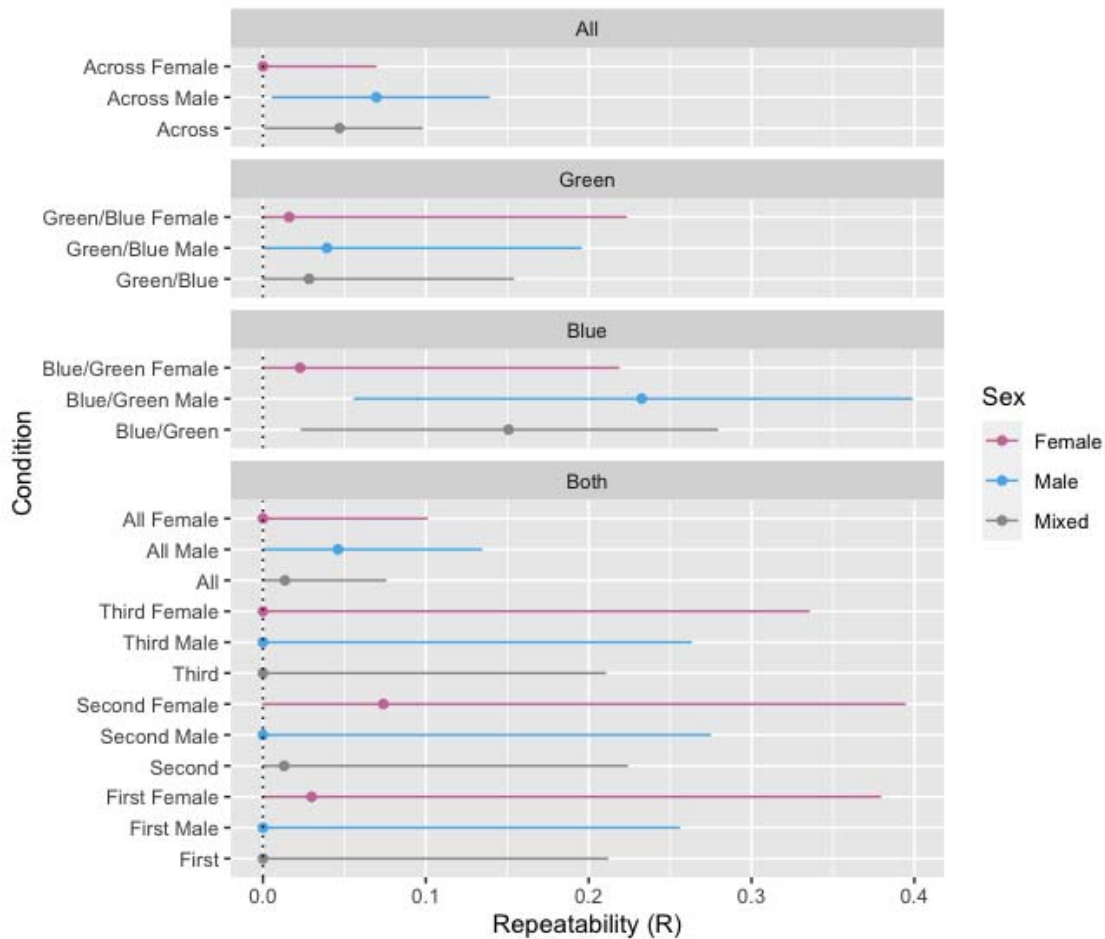

135

136 **Supplementary Figure 3**

137 The repeatability ( $R$ ) of aversive learning with 95% CIs in females, males and both sexes  
 138 together (mixed). The segments are from top to bottom: Across all conditions, the  
 139 ‘Green/Blue’ condition, the ‘Blue/Green’ condition, both ‘Green/Blue’ and ‘Blue/Green’  
 140 combined. In the bottom segments, the conditions are split into four measurement sets: ‘First’,  
 141 the first measurements of both ‘Green/Blue’ and ‘Blue/Green’ (set of two measurements),  
 142 ‘Second’, the second measurements of both ‘Green/Blue’ and ‘Blue/Green’, Third, the third  
 143 measurements of both ‘Green/Blue’ and ‘Blue/Green’, ‘All’, all measurements sets combined  
 144 (total of 6 measurements).

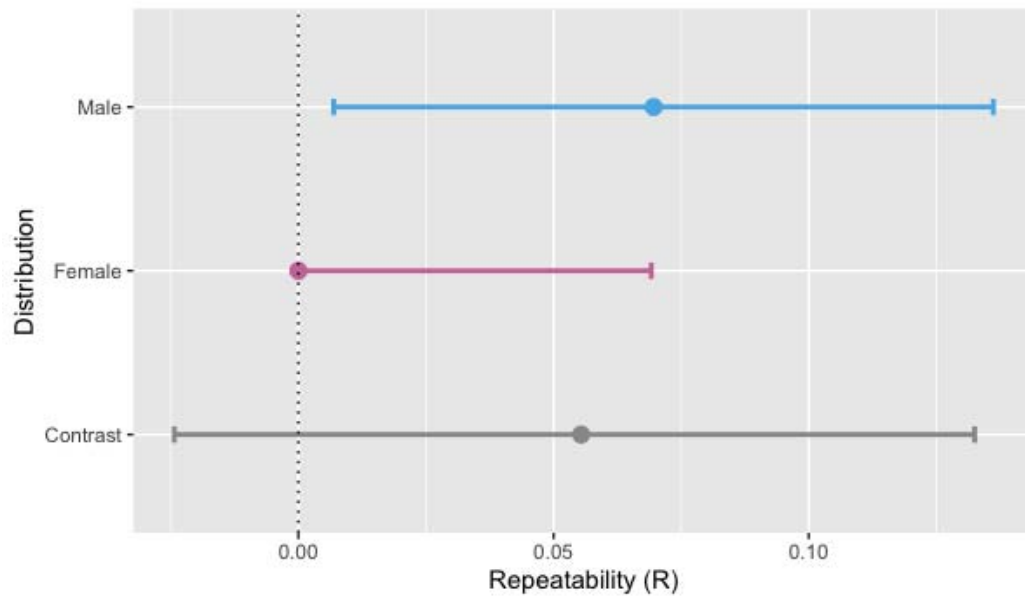

145

146 **Supplementary Figure 4**

147 Male and female zebrafish contrast analysis of repeatability estimates in across conditions  
148 trials. Male and females differ in the repeatability bootstrap distribution, however, the contrast  
149 analysis indicates by way of the distributions overlapping zero that males and females do not  
150 significantly differ in repeatability.

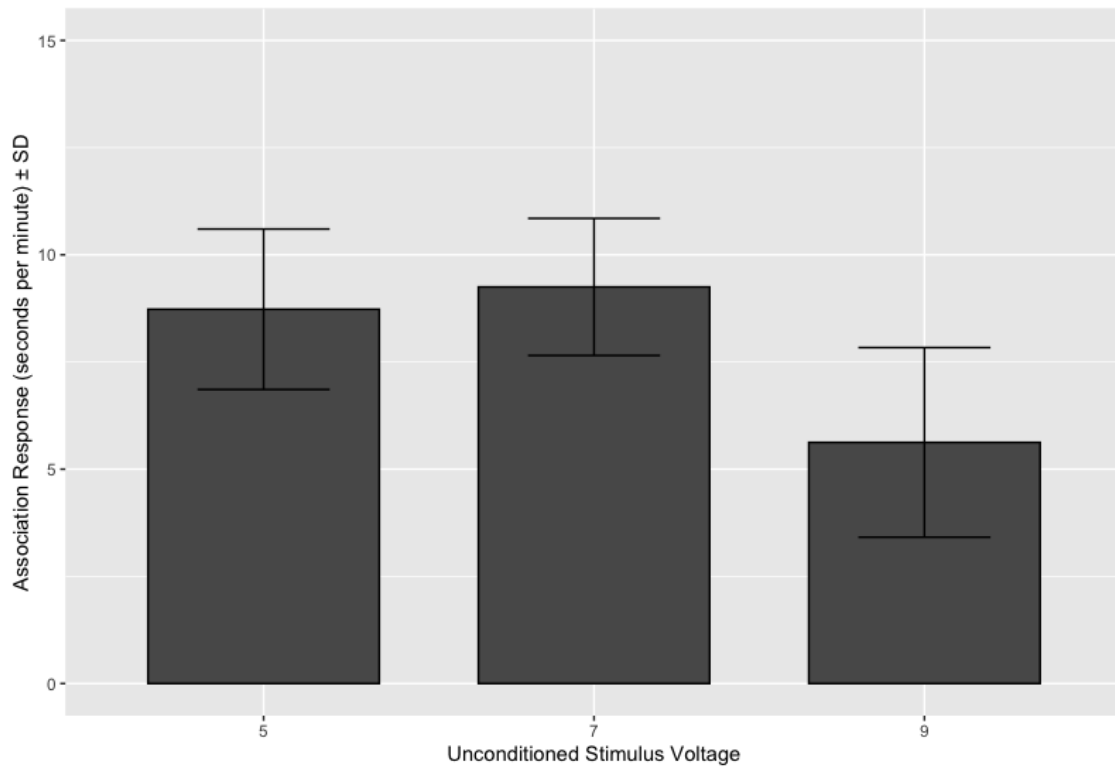

151

152 **Supplementary Figure 5**

153 Zebrafish learning performance in three voltage settings during pilot experiment with  
154 standard deviation. Mean difference in CS+ avoidance between baseline and probe phase in  
155 seconds per minute in five, seven and nine volts.

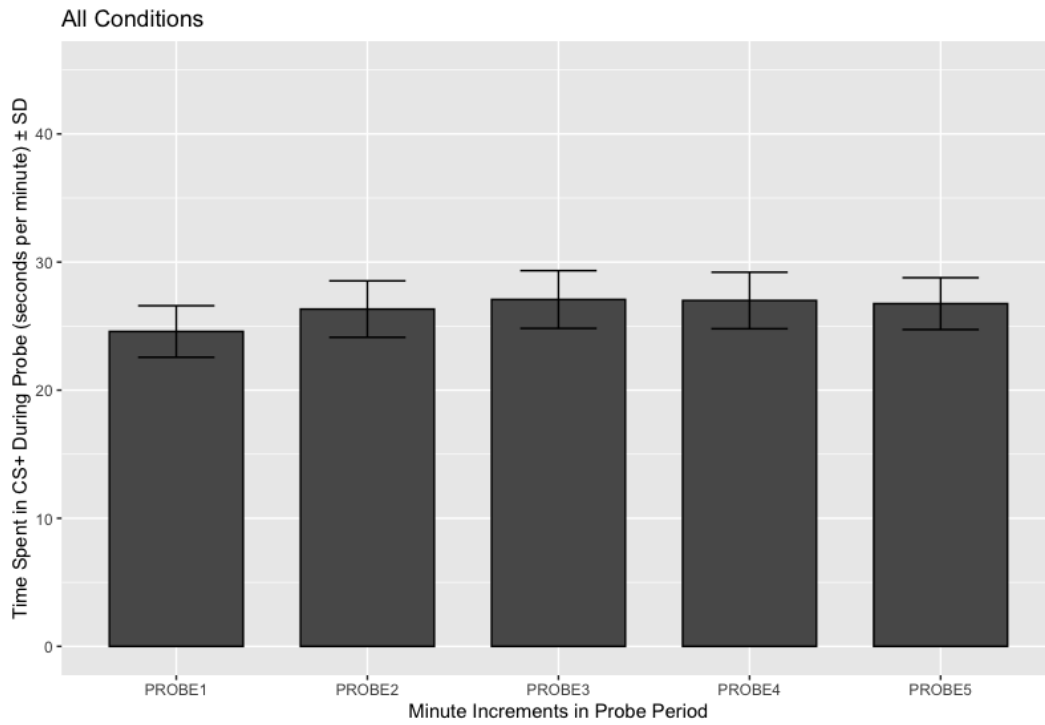

156

157

158 **Supplementary Figure 6**

159 Zebrafish learning performance across all conditions in the probe period with standard

160 deviation. Avoidance of the CS+ is shown separately for each minute of the probe.



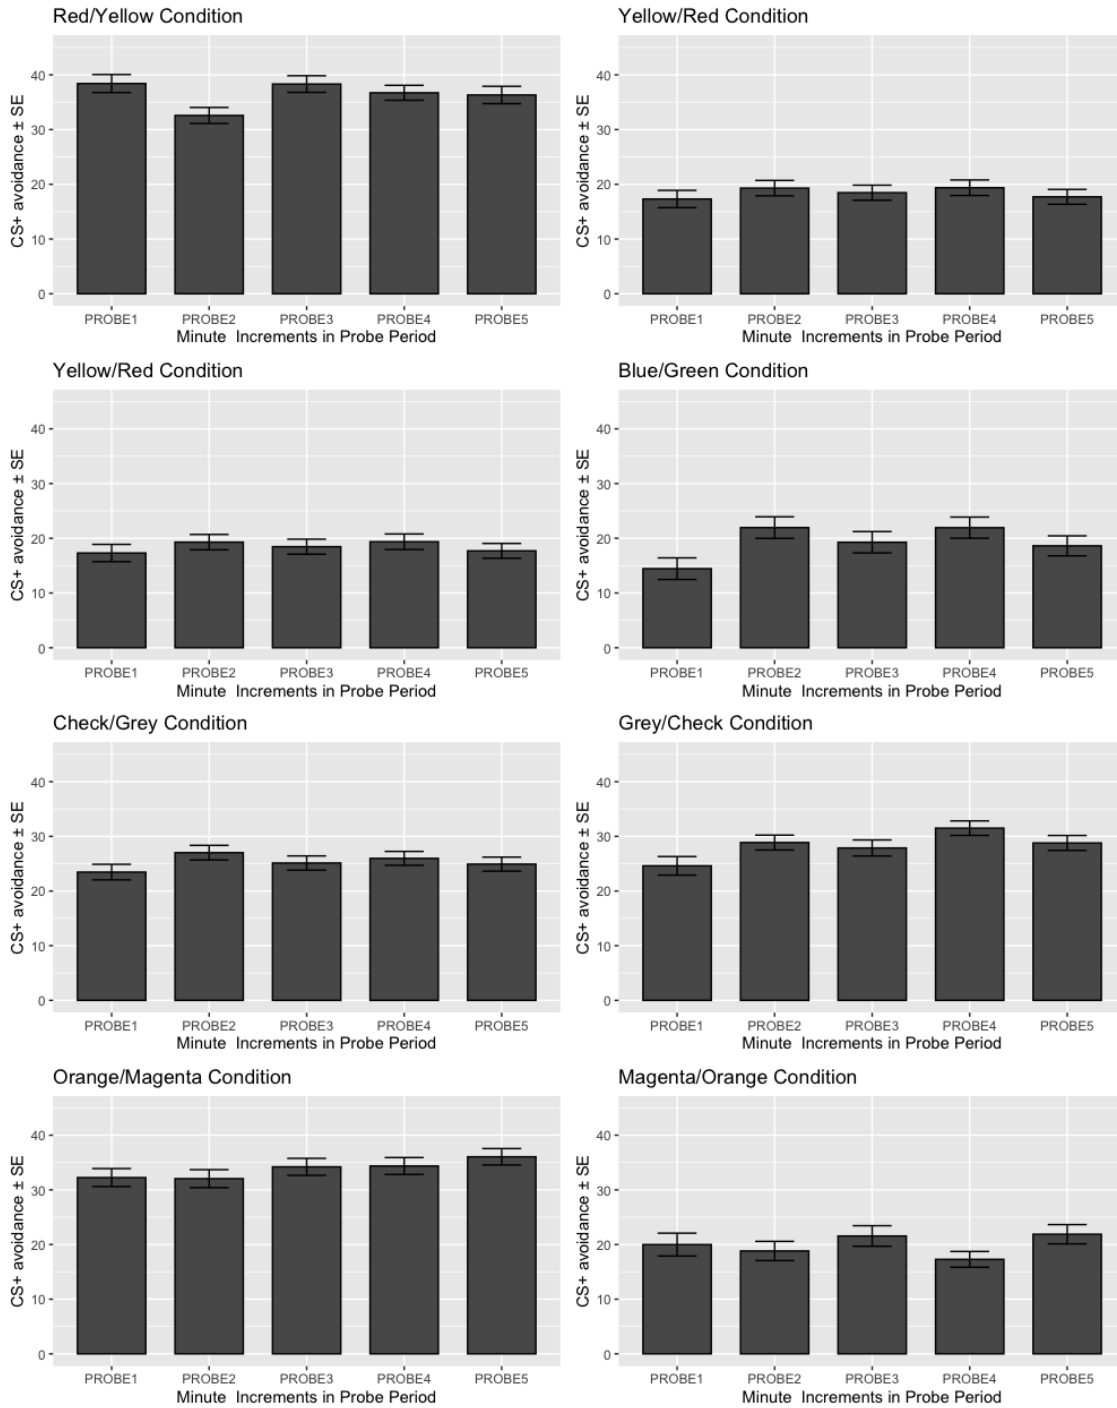

161

162

163 **Supplementary Figure 7**

164 Zebrafish learning performance in each condition during the probe period with standard error.

165 Avoidance of the CS+ is shown separately for each minute of the probe.

166 **Supplementary References**

- 167 Baker, M. R., & Wong, R. Y. (2019). Contextual fear learning and memory differ between  
168 stress coping styles in zebrafish. *Scientific Reports*, 9(1). [https://doi.org/10.1038/s41598-019-](https://doi.org/10.1038/s41598-019-46319-0)  
169 46319-0
- 170 Bell, A. M., Hankison, S. J., Laskowski, K. L., Bell, Alison M, Shala J. Hankison, and K. L.  
171 L., Bell, A. M., Hankison, S. J., & Laskowski, K. L. (2009). The repeatability of behaviour: a  
172 meta-analysis. *Animal Behaviour*, 77(4), 771–783.  
173 <https://doi.org/10.1016/j.anbehav.2008.12.022>.Bell
- 174 Brock, A. J., Sudwarts, A., Daggett, J., Parker, M. O., & Brennan, C. H. (2017). A fully  
175 automated computer based Skinner box for testing learning and memory in zebrafish.  
176 *BioRxiv*, 110478. <https://doi.org/10.1101/110478>
- 177 Fontana, B D, Cleal, M., Clay, J. M., & Parker, M. O. (2019). Zebrafish (*Danio rerio*)  
178 behavioral laterality predicts increased short-term avoidance memory but not stress-reactivity  
179 responses. *Animal Cognition*. <https://doi.org/10.1007/s10071-019-01296-9>
- 180 Kaneko, S., Masuda, R., & Yamashita, Y. (2019). Memory retention capacity using two  
181 different training methods, appetitive and aversive learning, in juvenile red sea bream  
182 *Chrysophrys major*. *Journal of Fish Biology*, 94(2), 231–240.  
183 <https://doi.org/10.1111/jfb.13876>
- 184 Kenney, J. W., Scott, I. C., Josselyn, S. A., & Frankland, P. W. (2017). Contextual fear  
185 conditioning in zebrafish. *Learning and Memory*, 24(10), 516–523.  
186 <https://doi.org/10.1101/lm.045690>.117
- 187 Namekawa, I., Moenig, N. R., & Friedrich, R. W. (2018). Rapid olfactory discrimination  
188 learning in adult zebrafish. *Experimental Brain Research*, 236(11), 2959–2969.  
189 <https://doi.org/10.1007/s00221-018-5352-x>
- 190 Thomson, H., Lamb, S., Besson, A., & Johnson, S. (2020). Long-term repeatability of  
191 behaviours in zebrafish (*Danio rerio*). *Ethology*, 10.1111/eth.13038  
192
